# Supplementary material for: A deep clustering-based mass spectral data visualization strategy for anti-renal fibrotic lead compound identification from natural products
Source: Royal Society of Chemistry journal article supplement (doi:10.1039/d2an01185a), 2022-01-01
Supplement: d2an01185a1.pdf [file d2an01185a1.pdf]

## SUPPORTING INFORMATION

# **Deep-clustering based mass spectral data visualization strategy for the anti-renal fibrotic lead compound identification from natural products**

Jieying Lai<sup>a,1</sup>, Lichuang Huang<sup>b,1</sup>, Yini Bao<sup>b,1</sup>, Lu Wang<sup>b</sup>, Qiang Lyu<sup>b</sup>, Haodan Kuang<sup>b</sup>, Kuilong Wang<sup>b</sup>, Xianan Sang<sup>b</sup>, Qiao Yang<sup>b</sup>, Qiyuan Shan<sup>b,\*</sup>, Gang Cao<sup>b,a,\*</sup>

<sup>a</sup> School of Pharmacy, Guizhou University of Traditional Chinese, Guiyang 550025, China

<sup>b</sup> School of Pharmaceutical Science, Zhejiang Chinese Medical University, Hangzhou 310053, China

\*Corresponding authors:

Dr. Qiyuan Shan

School of Pharmaceutical Science, Zhejiang Chinese Medical University, Hangzhou 310053, China

Email: shanqiyuan@zcmu.edu.cn

Prof. Gang Cao

School of Pharmaceutical Science, Zhejiang Chinese Medical University, Hangzhou 310053, China

Email: caogang33@163.com

<sup>1</sup> These authors equally contributed to the current study.

## Experimental Section

### Chemicals and materials

Methanol and acetonitrile of LC-MS grade were purchased from Merck (Damstadt, Germany). Ultrapure water (RSJ water purification technology co.) was prepared using Unique-R2 purification system under a resistivity of 18.25 M $\Omega$ /cm. Other reagent solutions were analytical grade.

The 16 reference standards including geniposidic acid (1), vanillic acid (2), caffeic acid (3), asperuloside (4), ferulic acid (5), plantamajoside (6), acetoside (7), calceolarioside B (8), plantainoside D (9), homoplantagin (10), isoacetoside (11), 2'-acetylacteoside (12), baicalin (13), apigenin (14), kaempferol (15), and oleanolic acid (16) were purchased from Chengdu Desit Company (Chengdu, China) (detailed structures are shown in **Figure S1**). The 132 reference standards (purity above 98%, Desit, Chengdu, China) for method validation were listed in the supplementary documents **Table S1**. TGF- $\beta$ , Antibodies to Fibronectin (ab2413),  $\alpha$ -SMA (14395), Collagen I (14695-1-AP) were purchased from Abcam.

The salt we used during processing was cooking salt bought from the supermarket (food grade salt, Tangshan Yin Hai Salt CO. LTD, China), with the content of sodium chloride was above 98.5g/100 g.

The seeds of *Plantago asiatica* L. (Plantagin Semen, PS) were purchased from Zhejiang University of Chinese Medicine Traditional Chinese Medicine Sliced Medicine Co., Ltd. (Hangzhou, China). The plant materials were authenticated by Prof. Luping Qin (School of Pharmaceutical Sciences, Zhejiang Chinese Medical University). The voucher specimens of the PS and the salt processed Plantagin Semen

(SPS) were deposited in the School of Pharmacy, Zhejiang Chinese Medical University (Nos. 20210910 and 20210910S, respectively).

## Supplementary Figures

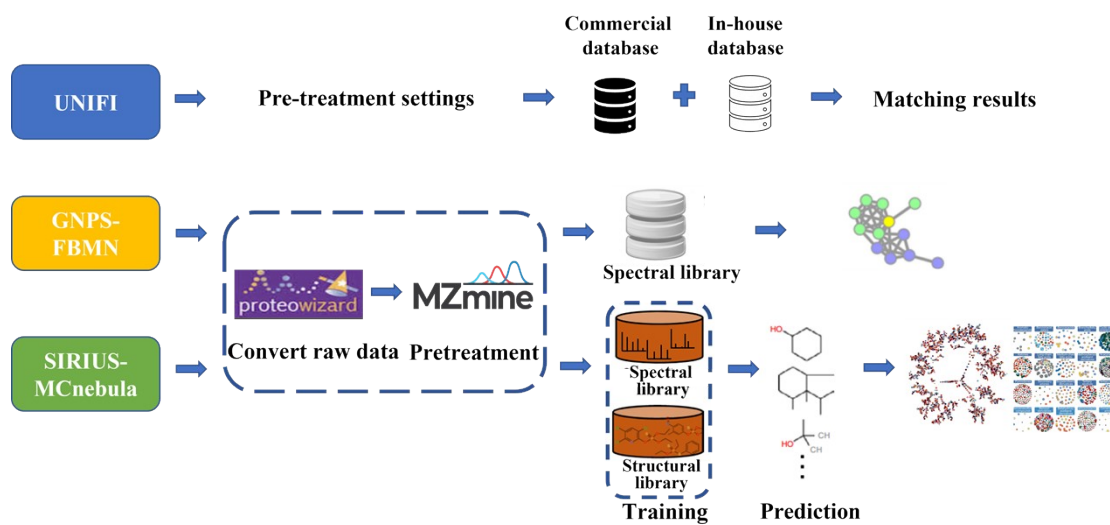

**Figure S1.** The flow chart of the three computational annotation workflows.

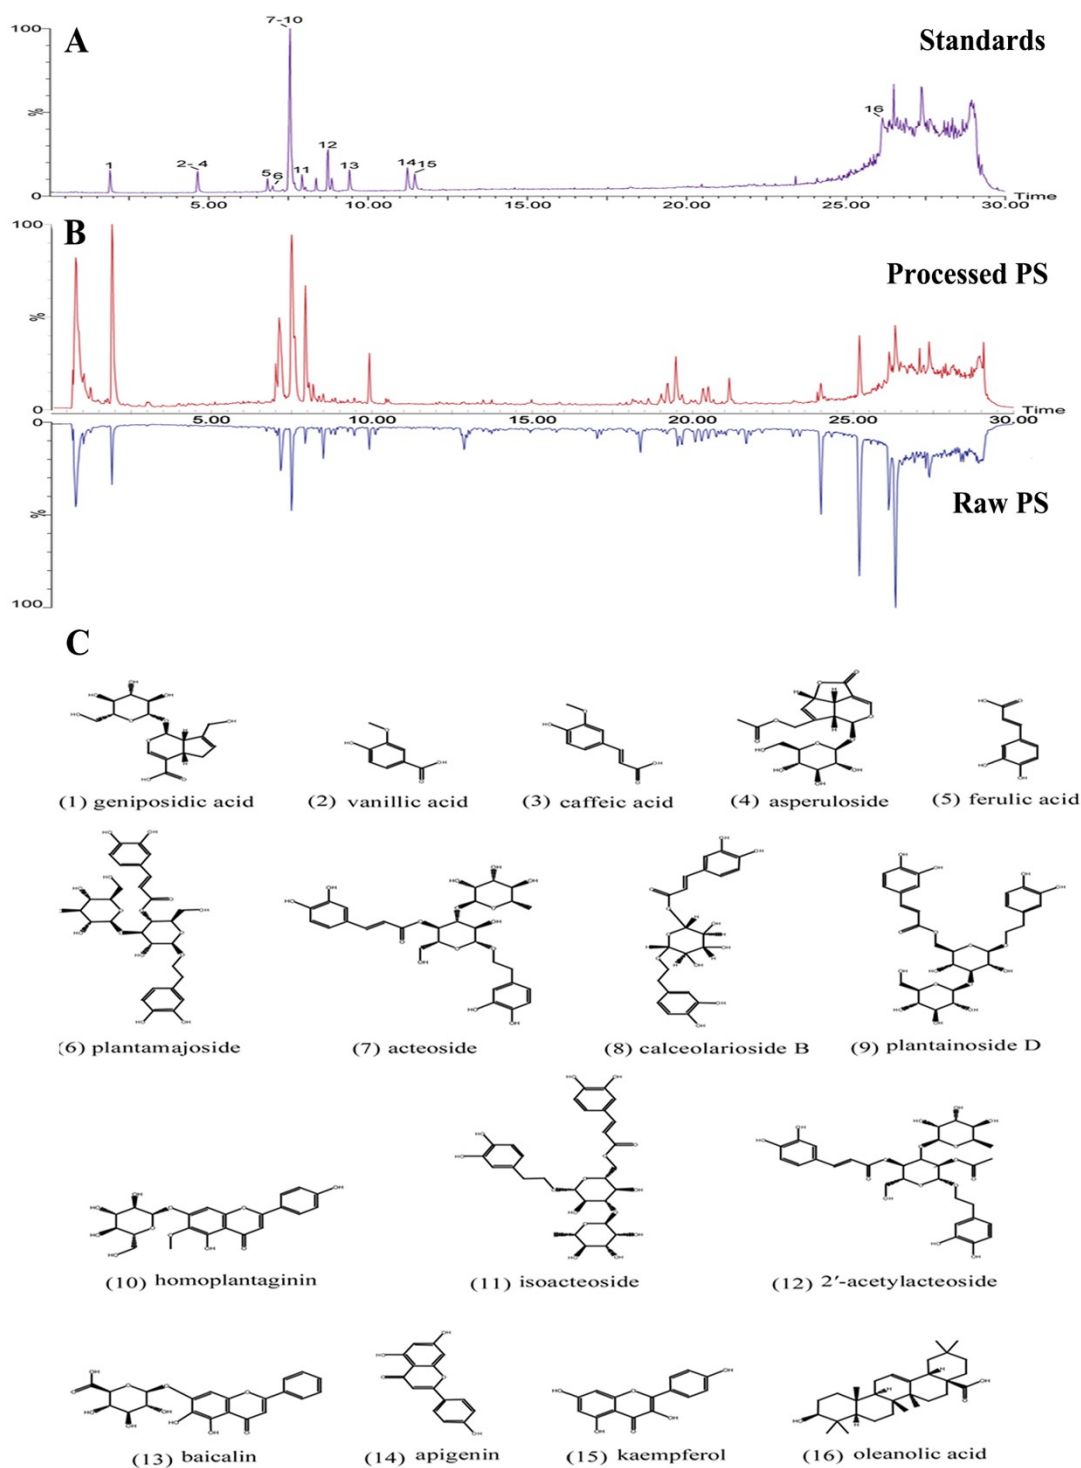

**Figure S2.** Typical TIC chromatograms of Plantaginis Semen (PS) in the negative ion mode. (A) The TIC chromatograms of the reference standards. (B) The typical TIC plots of the raw and processed PS. (C) The chemical structures of the 16 differentiate reference standards.

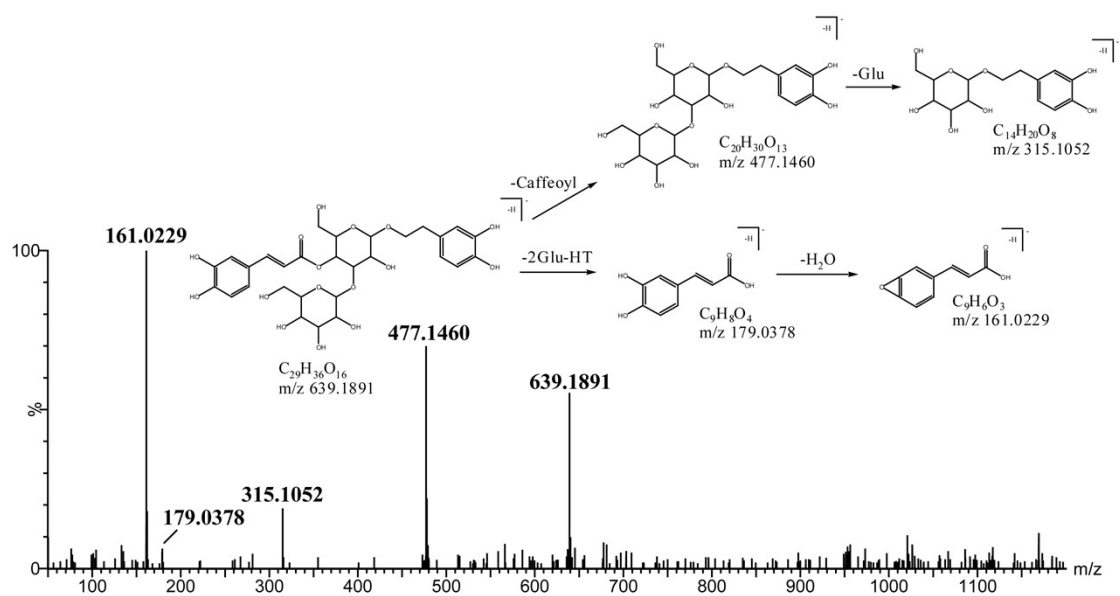

**Figure S3.** The proposed MS/MS fragmentation of Plantamajoside.

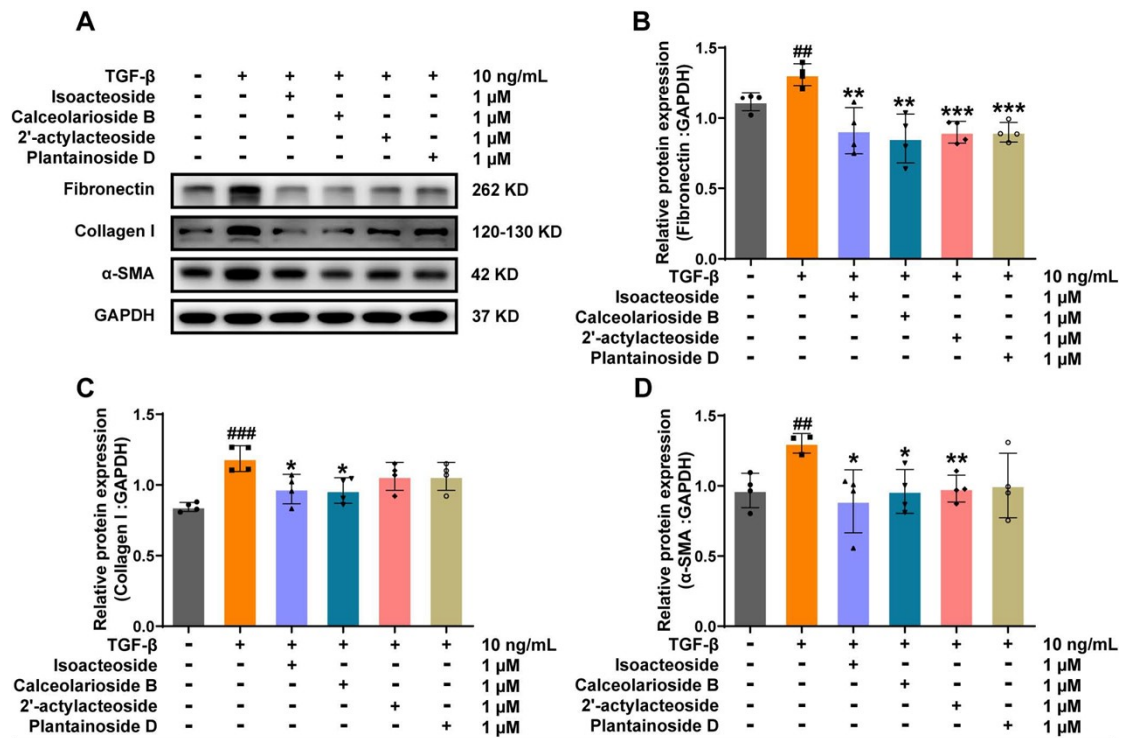

**Figure S4.** Western blot analyses of renal fibrotic proteins in TGF- $\beta$  ( $10 \text{ ng mL}^{-1}$ ) induced NRK-52E cells with the treatment of the four potential lead compounds ( $1 \text{ }\mu\text{M}$ ) screened from PS extracts after processing. (A) Protein level of fibronectin, collagen I,  $\alpha$ -SMA in NRK-52E cells treated with isoacteoside, calceolarioside B, 2'-actylacteoside, and plantainoside D at  $1 \text{ }\mu\text{M}$ . (B-D) Quantitative analyses of fibronectin, collagen I,  $\alpha$ -SMA levels in NRK-52E cells treated with isoacteoside, calceolarioside B, 2'-actylacteoside, and plantainoside D at  $1 \text{ }\mu\text{M}$ . ##  $P < 0.01$ , ###  $P < 0.001$  versus control; \*  $P < 0.05$ , \*\*  $P < 0.01$ , \*\*\*  $P < 0.001$  versus TGF- $\beta$  induced fibrotic model.

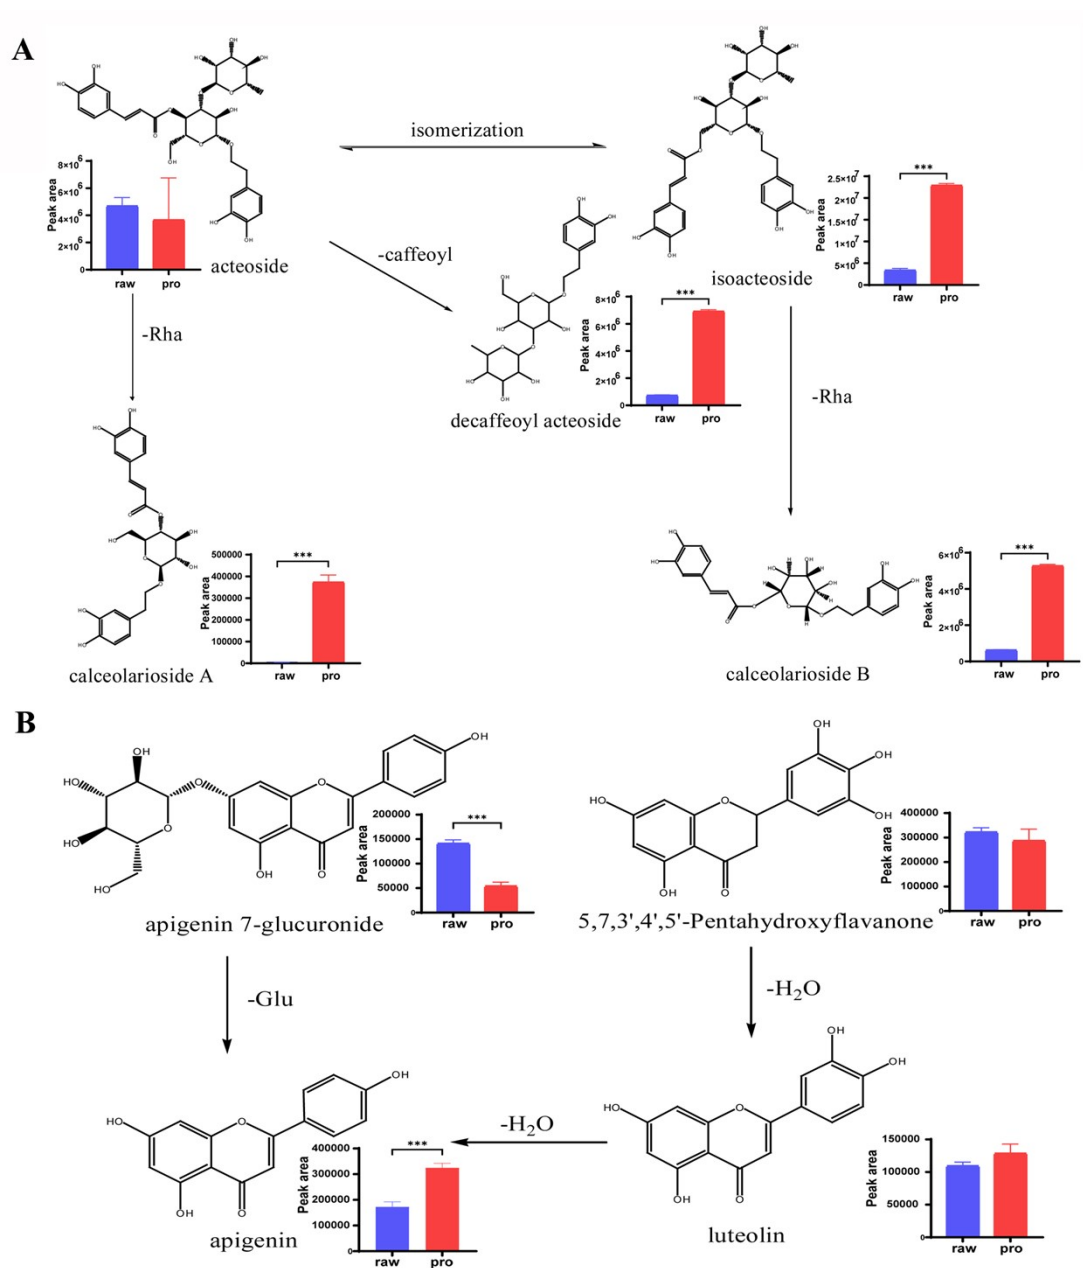

**Figure S5.** Possible chemical transformation of (A) phenyl ethanol glycosides and (B) flavonoid in PS after the traditional processing procedure. (Blue and red bars indicated relative contents in raw and processed PS extract, respectively (\* $P < 0.05$ ; \*\* $P < 0.01$ ; \*\*\* $P < 0.001$ )).



## Supplementary Table

**Table S1.** *In silico* mass spectra annotation results by UNIFI, GNPS-FBMN, SIRIUS-MCnebula workflow based on chemical reference standard pool (n=132). We use XlogP as the polarity indicator of each compound and roughly estimated their retention time distribution. Each group contained about 10 references, with isomers separated into different groups, and compounds within groups distributed separately by estimated retention time.

| Group | No. | Compound name    | CAS         | XlogP | Retention Time (min) | Formula                                         | Predicted Mass(m/z) | Detected |           |                 |
|-------|-----|------------------|-------------|-------|----------------------|-------------------------------------------------|---------------------|----------|-----------|-----------------|
|       |     |                  |             |       |                      |                                                 |                     | UNIFI    | GNPS-FBMN | SIRIUS-MCnebula |
| 1     | 1   | Geniposidic acid | 27741-01-1  | -2.7  | 1.90                 | C <sub>16</sub> H <sub>22</sub> O <sub>10</sub> | 374.1213            | ×        | ○         | ○               |
|       | 2   | Plantainoside D  | 147331-98-4 | -1    | 4.05                 | C <sub>29</sub> H <sub>36</sub> O <sub>16</sub> | 640.2003            | ×        | ×         | ○               |
|       | 3   | Plantamajoside   | 104777-68-6 | -1    | 4.44                 | C <sub>29</sub> H <sub>36</sub> O <sub>16</sub> | 640.2003            | ×        | ×         | ○               |
|       | 4   | Isoacteoside     | 61303-13-7  | -0.5  | 4.35                 | C <sub>29</sub> H <sub>36</sub> O <sub>15</sub> | 624.2054            | ×        | ○         | ○               |
|       | 5   | Acteoside        | 61276-17-3  | -0.5  | 4.61                 | C <sub>29</sub> H <sub>36</sub> O <sub>15</sub> | 624.2054            | ×        | ×         | ○               |
|       | 6   | Baicalin         | 21967-41-9  | 1.1   | 5.67                 | C <sub>21</sub> H <sub>18</sub> O <sub>11</sub> | 446.0849            | ×        | ×         | ○               |
|       | 7   | Vanillin         | 121-33-5    | 1.2   | 4.09                 | C <sub>8</sub> H <sub>8</sub> O <sub>3</sub>    | 152.0473            | ×        | ×         | ○               |
|       | 8   | Vanillic acid    | 121-34-6    | 1.4   | 3.29                 | C <sub>8</sub> H <sub>8</sub> O <sub>4</sub>    | 168.0423            | ×        | ×         | ○               |
|       | 9   | Ferulic acid     | 1135-24-6   | 1.5   | 4.42                 | C <sub>10</sub> H <sub>10</sub> O <sub>4</sub>  | 194.0579            | ×        | ×         | ○               |
|       | 10  | Baicalein        | 491-67-8    | 1.7   | 7                    | C <sub>15</sub> H <sub>10</sub> O <sub>5</sub>  | 270.0528            | ×        | ○         | ○               |
|       | 11  | Kaempferol       | 520-18-3    | 1.9   | 7.19                 | C <sub>15</sub> H <sub>10</sub> O <sub>6</sub>  | 286.0477            | ×        | ○         | ○               |

|   |    |                          |             |      |       |                                                 |          |   |   |   |
|---|----|--------------------------|-------------|------|-------|-------------------------------------------------|----------|---|---|---|
|   | 12 | Asperuloside             | 14259-45-1  | -2.4 | 3.09  | C <sub>18</sub> H <sub>22</sub> O <sub>11</sub> | 414.1162 | ○ | × | ○ |
| 2 | 1  | Quercetin 3-O-rutinoside | 949926-49-2 | -1.3 | 4.09  | C <sub>27</sub> H <sub>30</sub> O <sub>16</sub> | 610.1534 | × | ○ | ○ |
|   | 2  | Crocin II                | 55750-84-0  | -0.3 | 5.43  | C <sub>38</sub> H <sub>54</sub> O <sub>19</sub> | 814.3259 | × | × | × |
|   | 3  | Gallic acid              | 149-91-7    | 0.7  | 1.49  | C <sub>7</sub> H <sub>6</sub> O <sub>5</sub>    | 170.0215 | ○ | × | ○ |
|   | 4  | Quercitrin               | 522-12-3    | 0.9  | 4.80  | C <sub>21</sub> H <sub>20</sub> O <sub>11</sub> | 448.1006 | × | × | ○ |
|   | 5  | Quercetin                | 117-39-5    | 1.5  | 6.24  | C <sub>15</sub> H <sub>10</sub> O <sub>7</sub>  | 302.0427 | × | ○ | ○ |
|   | 6  | Isorhamnetin             | 480-19-3    | 1.9  | 7.34  | C <sub>16</sub> H <sub>12</sub> O <sub>7</sub>  | 316.0583 | × | × | × |
|   | 7  | Emodin                   | 518-82-1    | 2.7  | 10.92 | C <sub>15</sub> H <sub>10</sub> O <sub>5</sub>  | 270.0528 | ○ | × | ○ |
|   | 8  | Isoliquiritigenin        | 961-29-5    | 3.2  | 7.85  | C <sub>15</sub> H <sub>12</sub> O <sub>4</sub>  | 256.0736 | ○ | ○ | ○ |
| 3 | 1  | Pinoresinol diglucoside  | 63902-38-5  | -1.3 | 3.47  | C <sub>32</sub> H <sub>42</sub> O <sub>16</sub> | 682.2473 | × | ○ | ○ |
|   | 2  | Saikosaponin C           | 20736-08-7  | -0.2 | 7.66  | C <sub>48</sub> H <sub>78</sub> O <sub>17</sub> | 926.5239 | × | ○ | ○ |
|   | 3  | Astragalin               | 480-10-4    | 0.7  | 4.73  | C <sub>21</sub> H <sub>20</sub> O <sub>11</sub> | 448.1006 | × | ○ | ○ |
|   | 4  | Astragaloside A          | 83207-58-3  | 1.3  | 7.91  | C <sub>41</sub> H <sub>68</sub> O <sub>14</sub> | 784.4609 | ○ | × | ○ |
|   | 5  | Isoferulic acid          | 537-73-5    | 1.5  | 4.63  | C <sub>10</sub> H <sub>10</sub> O <sub>4</sub>  | 194.0579 | × | × | × |
|   | 6  | Saikosaponin G           | 99365-19-2  | 2.8  | 9.22  | C <sub>42</sub> H <sub>68</sub> O <sub>13</sub> | 780.4660 | × | ○ | ○ |
|   | 7  | demethoxycurcumin        | 22608-11-3  | 3.3  | 9.74  | C <sub>20</sub> H <sub>18</sub> O <sub>5</sub>  | 338.1154 | × | ○ | ○ |
|   | 8  | Medioresil               | 40957-99-1  | 2.3  | 7.15  | C <sub>21</sub> H <sub>24</sub> O <sub>7</sub>  | 388.1522 | × | × | ○ |
|   | 9  | Betulinic acid           | 472-15-1    | 8.2  | 15.40 | C <sub>30</sub> H <sub>48</sub> O <sub>3</sub>  | 456.3603 | × | × | × |

|   |    |                               |             |      |      |                                                 |          |   |   |   |
|---|----|-------------------------------|-------------|------|------|-------------------------------------------------|----------|---|---|---|
| 4 | 1  | Aucubin                       | 479-98-1    | -3   | 1.49 | C <sub>15</sub> H <sub>22</sub> O <sub>9</sub>  | 346.1264 | × | × | ○ |
|   | 2  | Esculentoside H               | 66656-92-6  | -1   | 5.63 | C <sub>48</sub> H <sub>76</sub> O <sub>21</sub> | 988.4879 | ○ | × | × |
|   | 3  | Chlorogenic acid              | 327-97-9    | -0.4 | 2.81 | C <sub>16</sub> H <sub>18</sub> O <sub>9</sub>  | 354.0951 | ○ | ○ | ○ |
|   | 4  | vitexin                       | 3681-93-4   | 0.2  | 4.18 | C <sub>21</sub> H <sub>20</sub> O <sub>10</sub> | 432.1056 | × | ○ | ○ |
|   | 5  | (+)-pinoresinol-β-D-glucoside | 69251-96-3  | 0.5  | 4.72 | C <sub>26</sub> H <sub>32</sub> O <sub>11</sub> | 520.1945 | × | × | ○ |
|   | 6  | Baicalein 6-O-glucoside       | 28279-72-3  | 0.9  | 4.92 | C <sub>21</sub> H <sub>20</sub> O <sub>10</sub> | 432.1057 | × | ○ | ○ |
|   | 7  | Wogonoside                    | 51059-44-0  | 1.4  | 6.64 | C <sub>22</sub> H <sub>20</sub> O <sub>11</sub> | 460.1006 | × | ○ | ○ |
|   | 8  | Taxifolin                     | 480-18-2    | 1.5  | 4.55 | C <sub>15</sub> H <sub>12</sub> O <sub>7</sub>  | 304.0583 | × | ○ | ○ |
|   | 9  | Saikosaponin F                | 62687-63-2  | 2.1  | 7.75 | C <sub>48</sub> H <sub>80</sub> O <sub>17</sub> | 928.5396 | ○ | × | ○ |
|   | 10 | Saikosaponin B4               | 58558-09-1  | 2.5  | 8.35 | C <sub>43</sub> H <sub>72</sub> O <sub>14</sub> | 812.4922 | × | ○ | ○ |
| 5 | 1  | L-cysteine                    | 52-90-4     | -2.5 | 0.82 | C <sub>3</sub> H <sub>7</sub> NO <sub>2</sub> S | 121.0198 | ○ | × | × |
|   | 2  | Albiflorin                    | 39011-90-0  | -1   | 3.64 | C <sub>23</sub> H <sub>28</sub> O <sub>11</sub> | 480.1632 | ○ | ○ | ○ |
|   | 3  | Galloylpaeoniflorin           | 122965-41-7 | -0.4 | 4.53 | C <sub>30</sub> H <sub>32</sub> O <sub>15</sub> | 632.1741 | ○ | × | ○ |
|   | 4  | Isovitexin                    | 29702-25-8  | 0.2  | 4.19 | C <sub>21</sub> H <sub>20</sub> O <sub>10</sub> | 432.1056 | × | ○ | ○ |
|   | 5  | Benzoylalbiflorin             | 184103-78-4 | 0.7  | 7.06 | C <sub>30</sub> H <sub>32</sub> O <sub>12</sub> | 584.1894 | × | × | ○ |
|   | 6  | 3,4-Dihydroxybenzoic acid     | 99-50-3     | 1.1  | 2.26 | C <sub>7</sub> H <sub>6</sub> O <sub>4</sub>    | 154.0266 | ○ | × | ○ |
|   | 7  | (α)-methoxysaikosap           | 104109-37-7 | 1.5  | 7.10 | C <sub>49</sub> H <sub>82</sub> O <sub>18</sub> | 958.5501 | × | × | × |

| onin F |    |                                    |             |      |       |                                                      |          |   |   |   |
|--------|----|------------------------------------|-------------|------|-------|------------------------------------------------------|----------|---|---|---|
|        | 8  | Saikosaponin I                     | 103629-71-6 | 1.8  | 7.64  | C <sub>48</sub> H <sub>78</sub> O <sub>17</sub>      | 926.5239 | × | ○ | ○ |
|        | 9  | Saikosaponin B2                    | 58316-41-9  | 2.5  | 8.87  | C <sub>42</sub> H <sub>68</sub> O <sub>13</sub>      | 780.4660 | × | ○ | ○ |
|        | 10 | Evodiamine                         | 518-17-2    | 3.1  | 9.72  | C <sub>19</sub> H <sub>17</sub> N <sub>3</sub> O     | 303.1372 | ○ | ○ | ○ |
| 6      | 1  | Gardenia yellow                    | 94238-00-3  | -2.5 | 7.04  | C <sub>44</sub> H <sub>64</sub> O <sub>24</sub>      | 976.3788 | ○ | × | × |
|        | 2  | Vitexin-2-O-rhamnoside             | 64820-99-1  | -0.9 | 4.08  | C <sub>27</sub> H <sub>30</sub> O <sub>14</sub>      | 578.1636 | × | ○ | ○ |
|        | 3  | Neochlorogenic acid                | 906-33-2    | -0.4 | 2.32  | C <sub>16</sub> H <sub>18</sub> O <sub>9</sub>       | 354.0951 | ○ | × | × |
|        | 4  | Catechin                           | 88191-48-4  | 0.4  | 2.91  | C <sub>15</sub> H <sub>14</sub> O <sub>6</sub>       | 290.0790 | × | ○ | ○ |
|        | 5  | Esculentoside A                    | 65497-07-6  | 0.8  | 7.45  | C <sub>42</sub> H <sub>66</sub> O <sub>16</sub>      | 826.4351 | ○ | × | ○ |
|        | 6  | Doxorubicin hydrochloride trans-4- | 25316-40-9  | 1.3  | 5.60  | C <sub>27</sub> H <sub>29</sub> NO <sub>1</sub><br>1 | 543.1741 | × | × | ○ |
|        | 7  | Hydroxycinnamic acid               | 501-98-4    | 1.5  | 4.13  | C <sub>9</sub> H <sub>8</sub> O <sub>3</sub>         | 164.0473 | × | × | ○ |
|        | 8  | Apigenin                           | 520-36-5    | 1.7  | 7.05  | C <sub>15</sub> H <sub>10</sub> O <sub>5</sub>       | 270.0528 | × | ○ | ○ |
|        | 9  | Procyanidin B1                     | 20315-25-7  | 2.4  | 2.53  | C <sub>30</sub> H <sub>26</sub> O <sub>12</sub>      | 578.1424 | × | ○ | ○ |
|        | 10 | Rutaecarpine                       | 20575-76-2  | 3    | 10.00 | C <sub>18</sub> H <sub>13</sub> N <sub>3</sub> O     | 287.1059 | × | × | × |
|        | 1  | Lactiflorin                        | 88623-95-4  | -0.5 | 5.57  | C <sub>23</sub> H <sub>26</sub> O <sub>10</sub>      | 462.1526 | × | × | ○ |
|        | 2  | Kaempferitrin                      | 482-38-2    | -0.1 | 4.23  | C <sub>27</sub> H <sub>30</sub> O <sub>14</sub>      | 578.1636 | × | ○ | ○ |
|        | 3  | Emodin-8-glucoside                 | 38840-23-2  | 0.9  | 6.51  | C <sub>21</sub> H <sub>20</sub> O <sub>10</sub>      | 432.1056 | × | ○ | ○ |

|   |   |                         |            |      |       |                                                 |          |   |   |   |
|---|---|-------------------------|------------|------|-------|-------------------------------------------------|----------|---|---|---|
|   | 4 | p-Hydroxybenzaldehyde   | 123-08-0   | 1.4  | 3.69  | C <sub>7</sub> H <sub>6</sub> O <sub>2</sub>    | 122.0368 | × | × | ○ |
|   | 5 | Saikosaponin H          | 91990-63-5 | 1.6  | 7.93  | C <sub>48</sub> H <sub>78</sub> O <sub>17</sub> | 926.5239 | × | ○ | ○ |
|   | 6 | (-)-Epipinoresinol      | 10061-38-8 | 2.3  | 1.71  | C <sub>20</sub> H <sub>22</sub> O <sub>6</sub>  | 358.1416 | × | × | × |
|   | 7 | Saikosaponin B3         | 58316-42-0 | 2.5  | 8.22  | C <sub>43</sub> H <sub>72</sub> O <sub>14</sub> | 812.4922 | × | × | ○ |
|   | 8 | Ursolic Acid            | 77-52-1    | 7.3  | 15.89 | C <sub>30</sub> H <sub>48</sub> O <sub>3</sub>  | 456.3603 | × | × | ○ |
| 8 | 1 | Liriodendrin            | 96038-87-8 | -1.4 | 3.74  | C <sub>34</sub> H <sub>46</sub> O <sub>18</sub> | 742.2684 | × | ○ | × |
|   | 2 | kaempferol-3-rutinoside | 17650-84-9 | -0.9 | 4.51  | C <sub>27</sub> H <sub>30</sub> O <sub>15</sub> | 594.1585 | × | ○ | ○ |
|   | 3 | Cryptochlorogenic acid  | 905-99-7   | -0.4 | 2.94  | C <sub>16</sub> H <sub>18</sub> O <sub>9</sub>  | 354.0951 | × | ○ | ○ |
|   | 4 | epicatechin             | 35323-91-2 | 0.4  | 3.36  | C <sub>15</sub> H <sub>14</sub> O <sub>6</sub>  | 290.0790 | ○ | ○ | ○ |
|   | 5 | 4-Hydroxybenzoic acid   | 99-96-7    | 1.6  | 2.95  | C <sub>7</sub> H <sub>6</sub> O <sub>3</sub>    | 138.0317 | ○ | × | × |
|   | 6 | Pinoresinol             | 4263-88-1  | 2.3  | 7.16  | C <sub>20</sub> H <sub>22</sub> O <sub>6</sub>  | 358.1416 | × | × | × |
|   | 7 | Saikosaponin D          | 20874-52-6 | 2.5  | 10.48 | C <sub>42</sub> H <sub>68</sub> O <sub>13</sub> | 780.4660 | × | ○ | ○ |
|   | 8 | Curcumin                | 458-37-7   | 3.2  | 9.98  | C <sub>21</sub> H <sub>20</sub> O <sub>6</sub>  | 368.1260 | × | ○ | ○ |
|   | 9 | Saikogenin D            | 5573-16-0  | 5.8  | 13.25 | C <sub>30</sub> H <sub>48</sub> O <sub>4</sub>  | 472.3553 | × | × | × |
|   | 1 | Oxypaeoniflora          | 39011-91-1 | -1.4 | 2.71  | C <sub>23</sub> H <sub>28</sub> O <sub>12</sub> | 496.1581 | ○ | × | ○ |
|   | 2 | Salvianic acid A        | 76822-21-4 | -0.2 | 1.98  | C <sub>9</sub> H <sub>10</sub> O <sub>5</sub>   | 198.0528 | × | × | ○ |
|   | 3 | Isoquercitrin           | 21637-25-2 | 0.4  | 4.30  | C <sub>21</sub> H <sub>20</sub> O <sub>12</sub> | 464.0955 | ○ | ○ | ○ |

|    |   |                                              |            |      |       |                                                 |          |   |   |   |
|----|---|----------------------------------------------|------------|------|-------|-------------------------------------------------|----------|---|---|---|
|    | 4 | Polydatin                                    | 65914-17-2 | 1.7  | 4.25  | C <sub>20</sub> H <sub>22</sub> O <sub>8</sub>  | 390.1315 | × | ○ | ○ |
|    | 5 | procyanidin B2                               | 29106-49-8 | 2.4  | 2.47  | C <sub>30</sub> H <sub>26</sub> O <sub>12</sub> | 578.1424 | × | ○ | ○ |
|    | 6 | Curcumol                                     | 4871-97-0  | 2.8  | 12.31 | C <sub>15</sub> H <sub>24</sub> O <sub>2</sub>  | 236.1776 | × | × | × |
|    | 7 | Germacrone                                   | 6902-91-6  | 3.5  | 13.45 | C <sub>15</sub> H <sub>22</sub> O               | 218.1671 | × | × | × |
|    | 8 | Resveratrol                                  | 501-36-0   | 3.1  | 5.66  | C <sub>14</sub> H <sub>12</sub> O <sub>3</sub>  | 228.0786 | × | ○ | ○ |
|    | 9 | Phytolaccagenin                              | 1802-12-6  | 4.5  | 9.21  | C <sub>31</sub> H <sub>48</sub> O <sub>7</sub>  | 532.3400 | ○ | ○ | × |
|    | 1 | Genipin 1-gentiobioside                      | 29307-60-6 | -4.5 | 0.79  | C <sub>23</sub> H <sub>34</sub> O <sub>15</sub> | 550.1898 | × | × | × |
|    | 2 | Deacetylasperulosidic acid methyl ester      | 52613-28-2 | -3.5 | 2.08  | C <sub>17</sub> H <sub>24</sub> O <sub>11</sub> | 404.1319 | × | × | ○ |
| 10 | 3 | (+)-medioresinol Di-o-beta-d-glucopyranoside | 88142-63-6 | -1.4 | 3.61  | C <sub>33</sub> H <sub>44</sub> O <sub>17</sub> | 712.2579 | × | × | ○ |
|    | 4 | Liquiritin                                   | 551-15-5   | 0.4  | 4.33  | C <sub>21</sub> H <sub>22</sub> O <sub>9</sub>  | 418.1264 | ○ | ○ | ○ |
|    | 5 | Saikosaponin A                               | 20736-09-8 | 2.5  | 8.89  | C <sub>42</sub> H <sub>68</sub> O <sub>13</sub> | 780.4660 | × | ○ | ○ |
|    | 6 | Bisdemethoxycurcumin                         | 33171-05-0 | 3.3  | 9.55  | C <sub>19</sub> H <sub>16</sub> O <sub>4</sub>  | 308.1049 | × | ○ | ○ |
|    | 1 | Ascorbic acid                                | 50-81-7    | -1.6 | 0.87  | C <sub>6</sub> H <sub>8</sub> O <sub>6</sub>    | 176.0321 | ○ | × | ○ |
|    | 2 | L-Malic acid                                 | 97-67-6    | -1.3 | 0.88  | C <sub>4</sub> H <sub>6</sub> O <sub>5</sub>    | 134.0215 | × | × | ○ |
|    | 3 | Esculin                                      | 531-75-9   | -0.6 | 2.45  | C <sub>15</sub> H <sub>16</sub> O <sub>9</sub>  | 340.0794 | ○ | × | ○ |
|    | 4 | Hyperoside                                   | 482-36-0   | 0.4  | 4.25  | C <sub>21</sub> H <sub>20</sub> O <sub>12</sub> | 464.0955 | × | ○ | ○ |

|    |   |                                |            |      |      |                                                 |           |   |   |   |
|----|---|--------------------------------|------------|------|------|-------------------------------------------------|-----------|---|---|---|
|    | 5 | Dihydromyricetin               | 27200-12-0 | 1.1  | 3.59 | C <sub>15</sub> H <sub>12</sub> O <sub>8</sub>  | 320.0532  | × | × | ○ |
|    | 6 | Luteolin                       | 286.2363   | 1.4  | 5.25 | C <sub>15</sub> H <sub>10</sub> O <sub>6</sub>  | 286.0477  | × | ○ | ○ |
|    | 7 | Umbelliferone                  | 93-35-6    | 1.6  | 4.37 | C <sub>9</sub> H <sub>6</sub> O <sub>3</sub>    | 162.0317  | ○ | × | ○ |
|    | 8 | Fisetin                        | 528-48-3   | 2    | 6.20 | C <sub>15</sub> H <sub>10</sub> O <sub>6</sub>  | 286.0477  | × | ○ | × |
|    | 9 | Naringenin                     | 480-41-1   | 2.4  | 7.09 | C <sub>15</sub> H <sub>12</sub> O <sub>5</sub>  | 272.0685  | × | ○ | ○ |
|    | 1 | D-(-)-Quinic acid              | 77-95-2    | -2.4 | 0.83 | C <sub>7</sub> H <sub>12</sub> O <sub>6</sub>   | 192.0634  | ○ | ○ | ○ |
|    | 2 | D-(-)-Isoascorbic acid         | 89-65-6    | -1.6 | 0.72 | C <sub>6</sub> H <sub>8</sub> O <sub>6</sub>    | 176.0321  | × | × | × |
| 12 | 3 | Kaempferol 3-o-glucorhamnoside | 482-39-3   | -0.4 | 4.54 | C <sub>27</sub> H <sub>30</sub> O <sub>15</sub> | 594.1585  | × | × | × |
|    | 4 | Guajaverin                     | 22255-13-6 | 0.4  | 4.63 | C <sub>20</sub> H <sub>18</sub> O <sub>11</sub> | 434.0849  | × | ○ | ○ |
|    | 5 | Xanthotoxol                    | 2009-24-7  | 1.6  | 5.56 | C <sub>9</sub> H <sub>6</sub> O <sub>2</sub>    | 202.02661 | ○ | × | ○ |
|    | 6 | Daidzein                       | 486-66-8   | 2.5  | 5.92 | C <sub>15</sub> H <sub>10</sub> O <sub>4</sub>  | 254.0579  | × | ○ | ○ |
|    | 1 | Troxeutin                      | 7085-55-4  | -2.4 | 4.22 | C <sub>33</sub> H <sub>42</sub> O <sub>19</sub> | 742.2320  | × | × | ○ |
|    | 2 | Quercetin 3-O-sophoroside      | 18609-17-1 | -1.2 | 3.58 | C <sub>27</sub> H <sub>30</sub> O <sub>17</sub> | 626.1483  | × | ○ | × |
|    | 3 | Myricetrin                     | 17912-87-7 | 0.5  | 4.19 | C <sub>21</sub> H <sub>20</sub> O <sub>12</sub> | 464.0955  | ○ | × | × |
| 13 | 4 | Daphnetin                      | 486-35-1   | 1.2  | 3.55 | C <sub>9</sub> H <sub>6</sub> O <sub>4</sub>    | 178.0266  | × | ○ | ○ |
|    | 5 | Scopoletin                     | 92-61-5    | 1.5  | 4.36 | C <sub>10</sub> H <sub>8</sub> O <sub>4</sub>   | 192.0423  | × | × | ○ |
|    | 6 | Icariin                        | 489-32-7   | 1.7  | 6.39 | C <sub>33</sub> H <sub>40</sub> O <sub>15</sub> | 676.2367  | ○ | ○ | ○ |
|    | 7 | Kaempferide                    | 491-54-3   | 2.2  | 9.48 | C <sub>16</sub> H <sub>12</sub> O <sub>6</sub>  | 300.0634  | × | ○ | ○ |

|    |   |                                     |            |      |       |                                                                                |          |   |   |   |
|----|---|-------------------------------------|------------|------|-------|--------------------------------------------------------------------------------|----------|---|---|---|
|    | 8 | Auraptene                           | 495-02-3   | 5.3  | 11.87 | C <sub>19</sub> H <sub>22</sub> O <sub>3</sub>                                 | 298.1569 | ○ | × | × |
|    | 1 | Hesperidin                          | 520-26-3   | -1.1 | 4.58  | C <sub>28</sub> H <sub>34</sub> O <sub>15</sub>                                | 610.1898 | × | × | × |
|    | 2 | Myricetin 3-O-galactoside           | 15648-86-9 | 0    | 3.71  | C <sub>21</sub> H <sub>20</sub> O <sub>13</sub>                                | 480.0904 | ○ | × | ○ |
|    | 3 | Quercetin-3-O-glucuronide           | 22688-79-5 | 0.6  | 4.34  | C <sub>21</sub> H <sub>18</sub> O <sub>13</sub>                                | 478.0747 | ○ | ○ | ○ |
| 14 | 4 | Myricetin                           | 529-44-2   | 1.2  | 5.23  | C <sub>15</sub> H <sub>10</sub> O <sub>8</sub>                                 | 318.0376 | ○ | ○ | ○ |
|    | 5 | Herbacetin                          | 527-95-7   | 2.2  | 5.94  | C <sub>15</sub> H <sub>10</sub> O <sub>7</sub>                                 | 302.0427 | × | ○ | ○ |
|    | 6 | 5,5'-Dithiobis(2-nitrobenzoic acid) | 69-78-3    | 2.7  | 8.04  | C <sub>14</sub> H <sub>8</sub> N <sub>2</sub> O <sub>8</sub><br>S <sub>2</sub> | 395.9722 | × | × | ○ |
|    | 7 | Bergamotone                         | 7380-40-7  | 5.6  | 16.99 | C <sub>21</sub> H <sub>22</sub> O <sub>4</sub>                                 | 338.1518 | × | × | × |
|    | 1 | L(+)-Tartaric acid                  | 87-69-4    | -1.9 | 0.87  | C <sub>4</sub> H <sub>6</sub> O <sub>6</sub>                                   | 150.0164 | × | × | ○ |
|    | 2 | Narcissoside                        | 604-80-8   | -1   | 4.58  | C <sub>28</sub> H <sub>32</sub> O <sub>16</sub>                                | 624.1690 | × | ○ | ○ |
|    | 3 | Adipic acid                         | 124-04-9   | 0.1  | 2.32  | C <sub>6</sub> H <sub>10</sub> O <sub>4</sub>                                  | 146.0579 | × | × | ○ |
|    | 4 | isorhamnetin-3-O-glucoside<br>3, 5- | 5041-82-7  | 0.7  | 4.82  | C <sub>22</sub> H <sub>22</sub> O <sub>12</sub>                                | 478.1111 | × | ○ | ○ |
| 15 | 5 | Dinitrosalicylic acid               | 609-99-4   | 1.3  | 6.05  | C <sub>7</sub> H <sub>4</sub> N <sub>2</sub> O <sub>7</sub>                    | 228.0019 | × | × | ○ |
|    | 6 | (-) -Epicatechin                    | 490-46-0   | 1.5  | 4.95  | C <sub>22</sub> H <sub>18</sub> O <sub>10</sub>                                | 442.0900 | × | × | × |
|    | 7 | Genistein                           | 446-72-0   | 2.7  | 7.04  | C <sub>15</sub> H <sub>10</sub> O <sub>5</sub>                                 | 270.0528 | × | ○ | ○ |
|    | 1 | Quercetin 3-                        | 7431-83-6  | -1.8 | 3.68  | C <sub>27</sub> H <sub>30</sub> O <sub>17</sub>                                | 626.1483 | × | ○ | ○ |



| gentiobioside |            |          |     |      |                                                 |          |   |   |   |
|---------------|------------|----------|-----|------|-------------------------------------------------|----------|---|---|---|
| 2             | Avicularin | 572-30-5 | 1   | 4.70 | C <sub>20</sub> H <sub>18</sub> O <sub>11</sub> | 434.0849 | × | ○ | ○ |
| 3             | Bergaptol  | 486-60-2 | 2   | 6.26 | C <sub>11</sub> H <sub>6</sub> O <sub>4</sub>   | 202.0266 | ○ | × | ○ |
| 4             | Galangin   | 548-83-4 | 2.3 | 9.46 | C <sub>15</sub> H <sub>10</sub> O <sub>5</sub>  | 270.0528 | × | ○ | ○ |

**Table S2.** Comparison of the three computational annotation workflows on annotation rate and validation rate.

| <b>UNIFI</b>                                           | <b>MS</b> | <b>GNPS-FBMN</b>                                   | <b>MS</b> | <b>SIRIUS-MCnebula</b>       | <b>MS</b> |
|--------------------------------------------------------|-----------|----------------------------------------------------|-----------|------------------------------|-----------|
|                                                        |           | Number of nodes                                    | 2445      |                              |           |
| Number of observed features                            | 27110     | Number of edges                                    | 2617      | Number of features           | 2363      |
|                                                        |           | Number of connected nodes                          | 890       |                              |           |
| Features with matched library annotations <sup>a</sup> | 3462      | Number of annotated nodes ( $\geq 0.7$ similarity) | 117       | Number of annotated features | 873       |
| Annotation rate (%) <sup>b</sup>                       | 12.77     | Annotation rate (%)                                | 4.79      | Annotation rate (%)          | 36.94     |
| Reference standard hit                                 | 35        | Reference standard hit                             | 64        | Reference standard hit       | 102       |
| Validation rate (%) <sup>c</sup>                       | 26.52     | Validation rate (%)                                | 48.48     | Validation rate (%)          | 77.27     |

a: The commercial database of UNIFI.

b: Annotation rate (%) = Number of annotated features/Number of features  $\times$  100%

c: Validation rate (%) = Number of compounds validated by the standards /Total reference standard pool (n=132)  $\times$  100%.

**Table S3.** Tentatively identified components of raw and processed PS extracts.

| No. | RT(min) | Formula                                         | Tentatively Identification                                                                                                                                     | Ion mode            | Measured Mass(m/z) | Predicted Mass(m/z) | Error (ppm) | Fragment ions(m/z)                                 | Content variation <sup>b</sup> | Ref. |
|-----|---------|-------------------------------------------------|----------------------------------------------------------------------------------------------------------------------------------------------------------------|---------------------|--------------------|---------------------|-------------|----------------------------------------------------|--------------------------------|------|
| 1   | 0.79    | C <sub>18</sub> H <sub>32</sub> O <sub>16</sub> | melitose                                                                                                                                                       | [M+Na] <sup>+</sup> | 527.1582           | 527.1588            | 1.14        | 365.1053 347.0946<br>527.1579 203.0522             | ↑***                           |      |
| 2   | 0.82    | C <sub>12</sub> H <sub>22</sub> O <sub>11</sub> | trehaose                                                                                                                                                       | [M+Na] <sup>+</sup> | 365.1052           | 365.1060            | 2.14        | 203.0523 265.1045<br>185.0415                      | ↑***                           |      |
| 3   | 1.05    | C <sub>6</sub> H <sub>10</sub> O <sub>8</sub>   | Allarate                                                                                                                                                       | [M-H] <sup>-</sup>  | 209.0292           | 209.0297            | 2.58        | 85.0284 209.0292<br>133.0134 191.0196              | ↓***                           |      |
| 4   | 1.60    | C <sub>13</sub> H <sub>16</sub> O <sub>10</sub> | 1-O-galloyl-β-D-glucose                                                                                                                                        | [M-H] <sup>-</sup>  | 331.0670           | 331.0665            | 1.45        | 169.0132 125.0234<br>331.0677 168.0054             | ↑***                           |      |
| 5   | 1.86    | C <sub>16</sub> H <sub>24</sub> O <sub>11</sub> | caryoptosidic acid                                                                                                                                             | [M-H] <sup>-</sup>  | 391.1238           | 391.1240            | 0.61        | 391.1238 165.0549<br>183.0652 139.0389             | ↑***                           |      |
| 6   | 2.18    | C <sub>8</sub> H <sub>8</sub> O <sub>4</sub>    | pacitron                                                                                                                                                       | [M+H] <sup>+</sup>  | 169.0490           | 169.0501            | 6.39        | 93.0340 151.0393<br>125.0604 110.0358              | ↑**                            |      |
| 7   | 2.43    | C <sub>10</sub> H <sub>10</sub> O <sub>4</sub>  | 2-[(4,6-dimethylpyrimidin-2-yl) amino] pentanoic acid                                                                                                          | [M+H] <sup>+</sup>  | 195.0646           | 195.0657            | 5.79        | 121.0652 149.0597<br>177.0536 91.0545              | ↑**                            |      |
| 8   | 2.43    | C <sub>10</sub> H <sub>8</sub> O <sub>3</sub>   | [(1R,2R,5R,6S)-2,6-dihydroxy-5-[(2S,3S,4R,5R,6S)-3,4,5-trihydroxy-6-(hydroxymethyl) oxan-2-yl]oxycyclohex-3-en-1-yl] (E)-3-(3,4-dihydroxyphenyl) prop-2-enoate | [M+H] <sup>+</sup>  | 177.0542           | 177.0552            | 5.48        | 149.0596 177.0544<br>121.0643 131.0494<br>105.0701 | ↑***                           |      |
| 9   | 2.74    | C <sub>8</sub> H <sub>8</sub> O <sub>4</sub>    | 5-methoxysalicylate                                                                                                                                            | [M-H] <sup>-</sup>  | 167.0345           | 167.0344            | 0.42        | 152.0108 108.0202<br>123.0478 153.0139             | ↑***                           |      |

|                  |      |                                                 |                                                                                                                                                                                               |                    |          |          |      |                                                    |      |   |
|------------------|------|-------------------------------------------------|-----------------------------------------------------------------------------------------------------------------------------------------------------------------------------------------------|--------------------|----------|----------|------|----------------------------------------------------|------|---|
| 10               | 2.74 | C <sub>28</sub> H <sub>36</sub> O <sub>18</sub> | [4-[(2S,3R,4S,5R,6R)-3,5-Dihydroxy-6-(hydroxymethyl)-4-[(2S,3R,4S,5S,6R)-3,4,5-trihydroxy-6-(hydroxymethyl) oxan-2-yl] oxyoxan-2-yl] oxy-3,5-dimethoxyphenyl] methyl 3,4,5-trihydroxybenzoate | [M-H] <sup>-</sup> | 659.1827 | 659.1823 | 0.55 | 167.0338 152.0103<br>123.0442 108.0206             | ↑*** |   |
| 11 <sup>ab</sup> | 3.01 | C <sub>16</sub> H <sub>22</sub> O <sub>10</sub> | geniposidic acid                                                                                                                                                                              | [M-H] <sup>-</sup> | 373.1137 | 373.1135 | 0.58 | 123.0442 149.0599<br>373.1136 211.0608             | ↑**  | 1 |
| 12               | 3.02 | C <sub>25</sub> H <sub>42</sub> O <sub>2</sub>  | 5-(n-Nonadecenyl) resorcinol                                                                                                                                                                  | [M-H] <sup>-</sup> | 373.3119 | 373.3107 | 3.32 | 123.0442 747.2328<br>149.0599 373.1136             | ↑**  |   |
| 13 <sup>b</sup>  | 3.22 | C <sub>22</sub> H <sub>32</sub> O <sub>15</sub> | desacetylhookerioside                                                                                                                                                                         | [M-H] <sup>-</sup> | 535.1667 | 535.1663 | 0.72 | 123.0448 149.0615<br>535.1652 211.0639             | ↑*** | 2 |
| 14 <sup>b</sup>  | 3.37 | C <sub>15</sub> H <sub>22</sub> O <sub>10</sub> | catalpol                                                                                                                                                                                      | [M-H] <sup>-</sup> | 361.1141 | 361.1135 | 1.87 | 315.1088 135.0465<br>373.1175                      | ↑*** | 3 |
| 15               | 3.43 | C <sub>14</sub> H <sub>20</sub> O <sub>8</sub>  | 2-(3,4-dihydroxyphenyl)-ethyl-O-β-D-glucopyranoside                                                                                                                                           | [M-H] <sup>-</sup> | 315.1083 | 315.1080 | 0.98 | 135.0436 315.1129<br>101.0235 89.0244<br>113.0227  | ↑*** |   |
| 16               | 3.82 | C <sub>16</sub> H <sub>24</sub> O <sub>10</sub> | mussaenosidic Acid                                                                                                                                                                            | [M-H] <sup>-</sup> | 375.1287 | 375.1291 | 1.12 | 125.0595 151.0753<br>213.0765 101.0238<br>112.0242 | ↑*** |   |
| 17               | 4.21 | C <sub>16</sub> H <sub>24</sub> O <sub>10</sub> | loganate                                                                                                                                                                                      | [M-H] <sup>-</sup> | 375.1297 | 375.1291 | 1.55 | 151.0757 169.0879<br>125.0596 169.0579<br>107.0515 | ↑*** |   |
| 18 <sup>b</sup>  | 4.35 | C <sub>20</sub> H <sub>30</sub> O <sub>12</sub> | decaffeoyl acteoside                                                                                                                                                                          | [M-H] <sup>-</sup> | 461.1657 | 461.1659 | 0.43 | 461.1656 135.0442<br>113.0235 315.1077             | ↑*** | 4 |
| 19 <sup>b</sup>  | 4.81 | C <sub>16</sub> H <sub>22</sub> O <sub>10</sub> | gardoside                                                                                                                                                                                     | [M-H] <sup>-</sup> | 373.1145 | 373.1135 | 2.76 | 149.0632 123.0443<br>167.0708 193.0450             | ↑**  | 2 |
| 20               | 5.20 | C <sub>9</sub> H <sub>10</sub> O <sub>3</sub>   | mesotol                                                                                                                                                                                       | [M-H] <sup>-</sup> | 165.0549 | 165.0552 | 1.64 | 165.0570 137.0250<br>119.0507                      | ↑*** |   |
| 21               | 5.32 | C <sub>8</sub> H <sub>8</sub> O <sub>4</sub>    | vanillate                                                                                                                                                                                     | [M+H] <sup>+</sup> | 169.0486 | 169.0501 | 8.75 | 151.0388 125.0604<br>110.0270 65.0377              | ↑*   |   |

|                  |      |                                                 |                                                                                                                                                                                                                                                                                                          |                    |          |          |      |                                                    |      |   |
|------------------|------|-------------------------------------------------|----------------------------------------------------------------------------------------------------------------------------------------------------------------------------------------------------------------------------------------------------------------------------------------------------------|--------------------|----------|----------|------|----------------------------------------------------|------|---|
| 22               | 5.61 | C <sub>15</sub> H <sub>20</sub> O <sub>9</sub>  | 2-(beta-D-glucopyranosyloxy)-4-hydroxybenzenepropionic acid                                                                                                                                                                                                                                              | [M-H] <sup>-</sup> | 343.1044 | 343.1029 | 4.34 | 181.0499 137.0609<br>135.0452 121.0216             | ↑    |   |
| 23 <sup>b</sup>  | 5.97 | C <sub>18</sub> H <sub>24</sub> O <sub>11</sub> | alpinoside                                                                                                                                                                                                                                                                                               | [M-H] <sup>-</sup> | 415.1248 | 415.1240 | 1.72 | 161.0237 415.1281<br>123.0438 149.0603             | ↑*** | 2 |
| 24 <sup>ab</sup> | 6.09 | C <sub>8</sub> H <sub>8</sub> O <sub>3</sub>    | vanillin                                                                                                                                                                                                                                                                                                 | [M-H] <sup>-</sup> | 151.0396 | 151.0395 | 0.76 | 151.0383 108.0239<br>138.0108 109.0291             | ↑*** | 5 |
| 25 <sup>ab</sup> | 6.13 | C <sub>8</sub> H <sub>8</sub> O <sub>4</sub>    | vanillic acid                                                                                                                                                                                                                                                                                            | [M-H] <sup>-</sup> | 167.0341 | 167.0344 | 2.01 | 152.0107 108.0210<br>123.0451 187.0381             | ↑**  | 5 |
| 26 <sup>ab</sup> | 6.18 | C <sub>10</sub> H <sub>10</sub> O <sub>4</sub>  | ferulic acid                                                                                                                                                                                                                                                                                             | [M-H] <sup>-</sup> | 193.0500 | 193.0501 | 0.41 | 193.0511 150.0323<br>108.0214 123.0458             | ↑*** | 6 |
| 27 <sup>ab</sup> | 6.20 | C <sub>18</sub> H <sub>22</sub> O <sub>11</sub> | asperuloside                                                                                                                                                                                                                                                                                             | [M-H] <sup>-</sup> | 413.1090 | 413.1084 | 1.48 | 147.0441 119.0491<br>413.1089 191.0351             | ↑    | 3 |
| 28 <sup>ab</sup> | 6.26 | C <sub>9</sub> H <sub>8</sub> O <sub>4</sub>    | caffeic acid                                                                                                                                                                                                                                                                                             | [M-H] <sup>-</sup> | 179.0343 | 179.0344 | 0.73 | 135.0439 179.0382<br>134.0386 138.0478             | ↑*** | 1 |
| 29 <sup>b</sup>  | 6.70 | C <sub>16</sub> H <sub>20</sub> O <sub>9</sub>  | gentiopicroside                                                                                                                                                                                                                                                                                          | [M-H] <sup>-</sup> | 355.1032 | 355.1029 | 0.82 | 175.0389 134.0361<br>193.0500 160.0159<br>235.0607 | ↓**  | 1 |
| 30               | 6.94 | C <sub>21</sub> H <sub>22</sub> O <sub>11</sub> | helicioside A                                                                                                                                                                                                                                                                                            | [M-H] <sup>-</sup> | 449.1097 | 449.1084 | 2.92 | 259.0616 269.0451<br>125.0235 287.0556             | ↓*** |   |
| 31               | 6.95 | C <sub>10</sub> H <sub>10</sub> O <sub>3</sub>  | 3-Formyl-4-hydroxyphenylpropanal                                                                                                                                                                                                                                                                         | [M-H] <sup>-</sup> | 177.0553 | 177.0552 | 0.73 | 177.0536 134.0365<br>162.0326 159.0457             | ↑*** |   |
| 32               | 7.30 | C <sub>31</sub> H <sub>40</sub> O <sub>17</sub> | [(2S,3R,4S,5R,6S)-4,5-dihydroxy-6-<br>[[[(1S,2S,4S,5S,6R,10S)-2-<br>(hydroxymethyl)-10-<br>[(2S,3R,4S,5S,6R)-3,4,5-trihydroxy-6-<br>(hydroxymethyl) oxan-2-yl] oxy-3,9-<br>dioxatricyclo [4.4.0.02,4] dec-7-en-5-<br>yl] oxy]-2-methyloxan-3-yl] (Z)-3-(4-<br>hydroxy-3-methoxyphenyl) prop-2-<br>enoate | [M-H] <sup>-</sup> | 683.2191 | 683.2187 | 0.56 | 123.0441 149.0595<br>165.0551 483.2098<br>267.0654 | ↑*** |   |
| 33 <sup>b</sup>  | 7.99 | C <sub>23</sub> H <sub>26</sub> O <sub>11</sub> | calceolarioside A                                                                                                                                                                                                                                                                                        | [M-H] <sup>-</sup> | 477.1403 | 477.1397 | 1.36 | 161.0238 477.1407<br>133.0290 179.0344             | ↑*** | 7 |

|                  |      |                                                 |                                                                                                                                |                    |          |          |      |                                        |      |   |
|------------------|------|-------------------------------------------------|--------------------------------------------------------------------------------------------------------------------------------|--------------------|----------|----------|------|----------------------------------------|------|---|
| 34               | 8.02 | C <sub>15</sub> H <sub>16</sub> O <sub>8</sub>  | skimmin                                                                                                                        | [M+H] <sup>+</sup> | 325.0917 | 325.0923 | 1.97 | 163.0388 145.0284<br>135.0442 117.0337 | ↑*   |   |
| 35               | 8.03 | C <sub>15</sub> H <sub>16</sub> O <sub>7</sub>  | (1R,5R,6R)-3,5,6-trihydroxycyclohex-3-en-1-yl (2E)-3-(3,4-dihydroxyphenyl) prop-2-enoate                                       | [M+H] <sup>+</sup> | 309.0962 | 309.0974 | 3.98 | 163.0386 145.0281<br>135.0446 117.0340 | ↑*   |   |
| 36               | 8.03 | C <sub>9</sub> H <sub>6</sub> O <sub>3</sub>    | (E)-3-(6-Hydroxycyclohexa-1,3,5-trien-1-yl) prop-2-enoic acid                                                                  | [M+H] <sup>+</sup> | 163.0390 | 163.0395 | 3.19 | 135.0442 117.0339<br>163.0388 89.0392  | ↑**  |   |
| 37               | 8.03 | C <sub>8</sub> H <sub>6</sub> O <sub>2</sub>    | 4-Ethynylbenzene-1,2-diol                                                                                                      | [M+H] <sup>+</sup> | 135.0439 | 135.0446 | 5.18 | 135.0442 89.0387<br>117.0335 107.0469  | ↑**  |   |
| 38 <sup>ab</sup> | 8.07 | C <sub>29</sub> H <sub>36</sub> O <sub>16</sub> | plantamajoside                                                                                                                 | [M-H] <sup>-</sup> | 639.1917 | 639.1925 | 1.27 | 161.0238 639.1923<br>477.1604 315.1081 | ↑*** | 1 |
| 39               | 8.20 | C <sub>10</sub> H <sub>10</sub> O <sub>3</sub>  | 2,4-diacetylphenol                                                                                                             | [M-H] <sup>-</sup> | 177.0550 | 177.0552 | 0.96 | 177.0543 135.0440<br>133.0282 162.0312 | ↑*** |   |
| 40               | 8.29 | C <sub>25</sub> H <sub>30</sub> O <sub>12</sub> | albidoside                                                                                                                     | [M-H] <sup>-</sup> | 521.1662 | 521.1659 | 0.58 | 175.0395 160.0154<br>193.0489 134.0375 | ↓    |   |
| 41 <sup>b</sup>  | 8.31 | C <sub>21</sub> H <sub>22</sub> O <sub>12</sub> | plantagoside                                                                                                                   | [M-H] <sup>-</sup> | 465.1031 | 465.1033 | 0.43 | 151.0388 313.0932<br>303.0492 465.1030 | ↓    | 1 |
| 42               | 8.45 | C <sub>35</sub> H <sub>46</sub> O <sub>20</sub> | lamiuside A                                                                                                                    | [M-H] <sup>-</sup> | 785.2514 | 785.2504 | 1.25 | 161.0232 623.2169<br>133.0275 461.1690 | ↑*** |   |
| 43               | 8.46 | C <sub>21</sub> H <sub>26</sub> O <sub>12</sub> | 2,6-dihydroxy-5- {[3,4,5-trihydroxy-6-(hydroxymethyl) oxan-2-yl] oxy} cyclohex-3-en-1-yl 3-(3,4-dihydroxyphenyl) prop-2-enoate | [M+H] <sup>+</sup> | 471.1498 | 471.1503 | 0.96 | 163.0385 145.0284<br>135.0442 117.0326 | ↑*** |   |
| 44 <sup>ab</sup> | 8.47 | C <sub>29</sub> H <sub>36</sub> O <sub>15</sub> | acteoside                                                                                                                      | [M-H] <sup>-</sup> | 623.1972 | 623.1976 | 0.65 | 161.0234 461.1657<br>623.1887 133.0285 | ↓    | 1 |
| 45 <sup>b</sup>  | 8.48 | C <sub>23</sub> H <sub>26</sub> O <sub>11</sub> | plantainoside B                                                                                                                | [M-H] <sup>-</sup> | 477.1403 | 477.1397 | 1.25 | 161.0235 477.1403<br>133.0287 179.0345 | ↑*** | 7 |
| 46 <sup>ab</sup> | 8.73 | C <sub>23</sub> H <sub>26</sub> O <sub>11</sub> | calceolarioside B                                                                                                              | [M-H] <sup>-</sup> | 477.1400 | 477.1397 | 0.56 | 161.0234 623.1975<br>477.1386 315.1070 | ↑*** | 7 |
| 47 <sup>ab</sup> | 8.74 | C <sub>29</sub> H <sub>36</sub> O <sub>16</sub> | plantainoside D                                                                                                                | [M-H] <sup>-</sup> | 639.1921 | 639.1925 | 0.67 | 161.0235 477.1801<br>639.1910 315.1088 | ↑*** | 7 |
| 48 <sup>ab</sup> | 8.74 | C <sub>29</sub> H <sub>36</sub> O <sub>15</sub> | isoacteoside                                                                                                                   | [M-H] <sup>-</sup> | 623.1969 | 623.1976 | 1.20 | 161.0238 623.1985<br>461.1662 315.1074 | ↑*** | 1 |

|                  |      |                                                 |                                                                                                                                                                                                                     |                    |          |          |       |                                                    |      |   |
|------------------|------|-------------------------------------------------|---------------------------------------------------------------------------------------------------------------------------------------------------------------------------------------------------------------------|--------------------|----------|----------|-------|----------------------------------------------------|------|---|
| 49               | 8.84 | C <sub>21</sub> H <sub>22</sub> O <sub>11</sub> | 2-hydroxy-2,3-dihydro-genistein                                                                                                                                                                                     | [M-H] <sup>-</sup> | 449.1094 | 449.1084 | 2.25  | 287.0558 449.1109<br>166.9982 327.1256             | ↑**  |   |
| 50 <sup>b</sup>  | 8.85 | C <sub>29</sub> H <sub>36</sub> O <sub>16</sub> | suspensaside                                                                                                                                                                                                        | [M-H] <sup>-</sup> | 639.1926 | 639.1925 | 0.64  | 161.0237 639.1922<br>477.1607 135.0441             | ↑    | 1 |
| 51               | 8.97 | C <sub>25</sub> H <sub>28</sub> O <sub>12</sub> | (1S,4aR,6S,7aS)-1-[(2R,3S,4R,5R,6S)-4,5-dihydroxy-6-(hydroxymethyl)-3-[(E)-3-(4-hydroxyphenyl) prop-2-enoyl] oxyoxan-2-yl] oxy-6-hydroxy-7-methylidene-4a,5,6,7a-tetrahydro-1H-cyclopenta[c]pyran-4-carboxylic acid | [M-H] <sup>-</sup> | 519.1509 | 519.1503 | 1.25  | 145.0283 149.0595<br>163.0393 123.0447<br>205.0499 | ↑**  |   |
| 52 <sup>b</sup>  | 9.00 | C <sub>20</sub> H <sub>30</sub> O <sub>12</sub> | verbasoside                                                                                                                                                                                                         | [M-H] <sup>-</sup> | 461.1665 | 461.1659 | 1.20  | 113.0238 481.1888<br>135.0421 315.1027             | ↑*** | 1 |
| 53               | 9.18 | C <sub>33</sub> H <sub>28</sub> O <sub>8</sub>  | 8-[(5,7-Dihydroxy-6-methyl-4-oxo-2-phenyl-2,3-dihydrochromen-8-yl) methyl]-5,7-dihydroxy-6-methyl-2-phenyl-2,3-dihydrochromen-4-one                                                                                 | [M-H] <sup>-</sup> | 551.1693 | 551.1706 | 2.34  | 151.0395 303.0511<br>125.0241 177.0184             | ↑    |   |
| 54               | 9.19 | C <sub>15</sub> H <sub>12</sub> O <sub>6</sub>  | steppogenin                                                                                                                                                                                                         | [M+H] <sup>+</sup> | 289.0697 | 289.0712 | 5.22  | 153.0177 163.0381<br>145.0275 289.0696             | ↓*   |   |
| 55               | 9.20 | C <sub>26</sub> H <sub>30</sub> O <sub>13</sub> | lippianoside B                                                                                                                                                                                                      | [M-H] <sup>-</sup> | 549.1606 | 549.1608 | 0.40  | 175.0391 123.0443<br>149.0597 193.0496<br>235.0603 | ↑*** |   |
| 56 <sup>ab</sup> | 9.27 | C <sub>21</sub> H <sub>18</sub> O <sub>12</sub> | homoplantagin                                                                                                                                                                                                       | [M-H] <sup>-</sup> | 461.1082 | 461.0720 | 78.41 | 283.0237 461.1012<br>163.0008 297.0421             | ↑    | 8 |
| 57               | 9.29 | C <sub>29</sub> H <sub>36</sub> O <sub>14</sub> | 2-(3,4-dihydroxyphenyl) ethyl 3-O-alpha-L-rhamnopyranosyl-4-O-[(Z)-3-(4-hydroxyphenyl) propenoyl]-beta-D-glucopyranoside                                                                                            | [M-H] <sup>-</sup> | 607.2023 | 607.2027 | 0.63  | 161.0235 145.0286<br>577.1564 133.0284             | ↑*** |   |
| 58 <sup>b</sup>  | 9.31 | C <sub>27</sub> H <sub>30</sub> O <sub>14</sub> | rhoifolin                                                                                                                                                                                                           | [M-H] <sup>-</sup> | 577.1556 | 577.1557 | 0.31  | 269.0447 577.1551<br>413.0824 288.0373             | ↑*** | 9 |
| 59 <sup>b</sup>  | 9.53 | C <sub>21</sub> H <sub>20</sub> O <sub>10</sub> | cosmosiin                                                                                                                                                                                                           | [M-H] <sup>-</sup> | 431.0983 | 431.0978 | 1.23  | 268.0388 431.0964<br>629.1978 151.0029             | ↑*** | 8 |
| 60 <sup>b</sup>  | 9.53 | C <sub>30</sub> H <sub>38</sub> O <sub>15</sub> | leucosceptoside A                                                                                                                                                                                                   | [M-H] <sup>-</sup> | 637.2132 | 637.2133 | 0.12  | 175.0386 637.2107                                  | ↑*** | 1 |

|                  |       |                                                 |                                                                                                                                  |                    |          |          |            |                                        |      |    |
|------------------|-------|-------------------------------------------------|----------------------------------------------------------------------------------------------------------------------------------|--------------------|----------|----------|------------|----------------------------------------|------|----|
|                  |       |                                                 |                                                                                                                                  |                    |          |          |            | 461.1656 315.1124                      |      |    |
| 61               | 9.68  | C <sub>21</sub> H <sub>24</sub> O <sub>9</sub>  | 2-[5-[2-(3,5-dihydroxyphenyl)ethenyl]-2-methoxyphenoxy]-6-(hydroxymethyl) oxane-3,4,5-triol                                      | [M-H] <sup>-</sup> | 419.1345 | 419.1342 | 0.69       | 165.0547 150.0312<br>208.0378 223.0600 | ↓**  |    |
| 62 <sup>b</sup>  | 9.72  | C <sub>15</sub> H <sub>12</sub> O <sub>7</sub>  | 5,7,3',4',5'-Pentahydroxyflavanone                                                                                               | [M-H] <sup>-</sup> | 303.0505 | 303.0505 | 0.10       | 151.0388 107.0088<br>125.0270 177.0104 | ↓    | 5  |
| 63 <sup>b</sup>  | 9.75  | C <sub>22</sub> H <sub>22</sub> O <sub>11</sub> | luteolin 7-O-β-D-glucoside                                                                                                       | [M-H] <sup>-</sup> | 461.1096 | 461.1084 | 2.57       | 283.0237 461.1078<br>163.0027 297.0396 | ↑*   | 10 |
| 64               | 9.78  | C <sub>20</sub> H <sub>18</sub> O <sub>6</sub>  | 2,4-Bis[(2,4-dihydroxyphenyl) methyl] benzene-1,3-diol                                                                           | [M-H] <sup>-</sup> | 353.1032 | 353.1025 | 1.95       | 323.0546 279.0666<br>338.0817 251.0694 | ↑**  |    |
| 65 <sup>b</sup>  | 9.88  | C <sub>21</sub> H <sub>22</sub> O <sub>11</sub> | miscanthoside                                                                                                                    | [M-H] <sup>-</sup> | 449.1079 | 449.1084 | 1.13       | 151.0027 287.0554<br>135.0444 125.0233 | ↑    | 1  |
| 66 <sup>b</sup>  | 10.19 | C <sub>30</sub> H <sub>38</sub> O <sub>15</sub> | plantainoside C                                                                                                                  | [M-H] <sup>-</sup> | 637.2130 | 637.2133 | 0.39       | 175.0289 461.1710<br>315.1104 161.0229 | ↑*** | 7  |
| 67               | 10.25 | C <sub>8</sub> H <sub>8</sub> O <sub>2</sub>    | vinylcatechol                                                                                                                    | [M-H] <sup>-</sup> | 135.0448 | 135.0446 | 1.48       | 135.0435 134.0384<br>117.0328          | ↑*** |    |
| 68               | 10.31 | C <sub>30</sub> H <sub>34</sub> O <sub>17</sub> | 7-[(6-O-Acetyl-2-O-beta-D-allopyranosyl-beta-D-glucopyranosyl)oxy]-5-hydroxy-2-(4-hydroxy-3-methoxyphenyl)-4H-1-benzopyran-4-one | [M-H] <sup>-</sup> | 665.1725 | 665.1718 | 1.10       | 269.0446 619.1687<br>577.1589 268.0363 | ↓*   |    |
| 69               | 10.55 | C <sub>23</sub> H <sub>22</sub> O <sub>11</sub> | 3-(4-Hydroxyphenyl)-5-(6-O-acetyl-beta-D-glucopyranosyloxy)-7-hydroxy-4H-1-benzopyran-4-one                                      | [M-H] <sup>-</sup> | 473.1098 | 473.1084 | 2.98       | 268.0375 269.0450<br>473.1105 239.0359 | ↓**  |    |
| 70 <sup>b</sup>  | 10.71 | C <sub>21</sub> H <sub>18</sub> O <sub>11</sub> | apigenin 7-glucuronide                                                                                                           | [M-H] <sup>-</sup> | 445.0776 | 445.0771 | 1.15       | 269.0452 241.0489<br>197.0628 225.0568 | ↓*** | 9  |
| 71 <sup>ab</sup> | 10.60 | C <sub>31</sub> H <sub>38</sub> O <sub>16</sub> | 2'-acetylacteoside                                                                                                               | [M-H] <sup>-</sup> | 665.2073 | 665.2082 | 1.292<br>8 | 161.0234 133.0285<br>665.2136 135.0446 | ↑**  | 11 |



|                  |       |                                                 |                                                                                                                                                                                                                                                      |                     |          |          |      |                                        |      |   |
|------------------|-------|-------------------------------------------------|------------------------------------------------------------------------------------------------------------------------------------------------------------------------------------------------------------------------------------------------------|---------------------|----------|----------|------|----------------------------------------|------|---|
| 72               | 10.63 | C <sub>23</sub> H <sub>24</sub> O <sub>12</sub> | coccinoside A                                                                                                                                                                                                                                        | [M-H] <sup>-</sup>  | 491.1204 | 491.1190 | 2.95 | 151.0030 135.0436<br>287.0571 165.0579 | ↑    |   |
| 73               | 10.95 | C <sub>20</sub> H <sub>36</sub> O <sub>12</sub> | ebracteatoside C                                                                                                                                                                                                                                     | [M-H] <sup>-</sup>  | 467.2125 | 467.2128 | 0.75 | 467.2129 289.1653<br>161.0445 101.0234 | ↑*** |   |
| 74               | 11.05 | C <sub>21</sub> H <sub>24</sub> O <sub>11</sub> | rocellin                                                                                                                                                                                                                                             | [M+Na] <sup>+</sup> | 475.1228 | 475.1216 | 2.46 | 271.0597 153.0168                      | ↑*** |   |
| 75               | 11.29 | C <sub>22</sub> H <sub>26</sub> O <sub>8</sub>  | rayalinol                                                                                                                                                                                                                                            | [M-H] <sup>-</sup>  | 417.1560 | 417.1549 | 2.54 | 323.0577 338.0810<br>341.1049 267.0653 | ↑*   |   |
| 76               | 11.32 | C <sub>20</sub> H <sub>20</sub> O <sub>7</sub>  | averantin                                                                                                                                                                                                                                            | [M-H] <sup>-</sup>  | 371.1133 | 371.1131 | 0.59 | 267.0646 323.0553<br>279.0665 353.1005 | ↑**  |   |
| 77               | 11.53 | C <sub>15</sub> H <sub>12</sub> O <sub>6</sub>  | eriodictiol                                                                                                                                                                                                                                          | [M-H] <sup>-</sup>  | 287.0552 | 287.0556 | 1.25 | 135.0443 151.0027<br>489.2312 287.0582 | ↑**  |   |
| 78               | 11.60 | C <sub>29</sub> H <sub>32</sub> O <sub>15</sub> | 7-[(6-O-Acetyl-2-O-alpha-L-rhamnopyranosyl-beta-D-glucopyranosyl) oxy]-4',5-dihydroxyflavone                                                                                                                                                         | [M-H] <sup>-</sup>  | 619.1664 | 619.1663 | 0.16 | 269.0446 268.0366<br>619.1662 577.1678 | ↑*** |   |
| 79 <sup>ab</sup> | 11.62 | C <sub>15</sub> H <sub>10</sub> O <sub>6</sub>  | luteolin                                                                                                                                                                                                                                             | [M-H] <sup>-</sup>  | 285.0399 | 285.0399 | 0.10 | 285.0406 135.0448<br>107.0130 151.0033 | ↑    | 1 |
| 80               | 11.74 | C <sub>23</sub> H <sub>22</sub> O <sub>11</sub> | 6-o-acetylgénistin                                                                                                                                                                                                                                   | [M-H] <sup>-</sup>  | 473.1087 | 473.1084 | 0.66 | 268.0370 473.1089<br>240.0434 239.0349 | ↑*** |   |
| 81               | 12.18 | C <sub>40</sub> H <sub>54</sub> O <sub>17</sub> | [(3R,6S)-6-[(3R,6S)-6-[[[(6S,7R)-4,10-dihydroxy-7-[(1S,3S,4R)-3-hydroxy-1-methoxy-2-oxo-4-propanoyloxy-pentyl]-6-methoxy-3-methyl-5-oxo-7,8-dihydro-6H-anthracen-2-yl] oxy]-3-hydroxy-2-methyloxan-4-yl] oxy-3-hydroxy-2-methyloxan-4-yl] propanoate | [M-H] <sup>-</sup>  | 805.3298 | 805.3282 | 1.89 | 651.2434 805.3303<br>490.2004 773.3055 | ↓**  |   |
| 82               | 12.28 | C <sub>31</sub> H <sub>30</sub> O <sub>14</sub> | (2R)-2beta-(3,4-Dihydroxyphenyl)-5-hydroxy-7-[6-O-[3-(3-methoxy-4-hydroxyphenyl) acryloyl]-beta-D-glucopyranosyloxy]-3,4-dihydro-2H-1-benzopyran-4-one                                                                                               | [M-H] <sup>-</sup>  | 625.1573 | 625.1557 | 2.51 | 151.0030 135.0439<br>287.0556 337.0917 | ↑    |   |

|                  |       |                                                 |                                                                                                                                                                                                                           |                    |          |          |      |                                        |      |    |
|------------------|-------|-------------------------------------------------|---------------------------------------------------------------------------------------------------------------------------------------------------------------------------------------------------------------------------|--------------------|----------|----------|------|----------------------------------------|------|----|
| 83 <sup>b</sup>  | 12.86 | C <sub>15</sub> H <sub>10</sub> O <sub>5</sub>  | baicalein                                                                                                                                                                                                                 | [M-H] <sup>-</sup> | 269.0449 | 269.0450 | 0.42 | 269.0459 151.0038<br>117.0385 201.0516 | ↑*** | 12 |
| 84 <sup>ab</sup> | 12.87 | C <sub>15</sub> H <sub>10</sub> O <sub>5</sub>  | apigenin                                                                                                                                                                                                                  | [M-H] <sup>-</sup> | 269.0447 | 269.0450 | 1.20 | 269.0454 117.0349<br>151.0044 225.0579 | ↑*** | 13 |
| 85               | 12.92 | C <sub>32</sub> H <sub>54</sub> O <sub>16</sub> | [(2R,3S,4R,5R,6R)-6-[Acetyloxy-<br>[(2S,3S,4R,5R)-4-acetyloxy-2-<br>hydroxy-5-(hydroxymethyl)-3-(5-<br>methylheptanoyloxy) oxolan-2-yl]<br>methoxy]-4,5-dihydroxy-2-<br>(hydroxymethyl) oxan-3-yl] 5-<br>methylheptanoate | [M-H] <sup>-</sup> | 693.3338 | 693.3334 | 0.63 | 311.2586 355.2484<br>693.3333 337.2389 | ↓*   |    |
| 86               | 14.76 | C <sub>30</sub> H <sub>48</sub> O <sub>6</sub>  | brahmie acid                                                                                                                                                                                                              | [M-H] <sup>-</sup> | 503.3363 | 503.3373 | 1.91 | 503.3370 401.3070<br>485.3274 459.3509 | ↓    |    |
| 87               | 24.78 | C <sub>30</sub> H <sub>46</sub> O <sub>2</sub>  | (6aR,6bR,12aR,14bS)-<br>2,2,6a,6b,9,9,12a-heptamethyl-10-oxo-<br>3,4,5,6,6a,7,8,8a,11,12,13,14b-<br>dodecahydro-1H-picene-4a-<br>carbaldehyde                                                                             | [M+H] <sup>+</sup> | 439.3573 | 439.3576 | 0.71 | 203.1787 189.1632<br>119.0857 149.1326 | ↓*   |    |
| 88               | 24.92 | C <sub>18</sub> H <sub>30</sub> O <sub>2</sub>  | crepenynate                                                                                                                                                                                                               | [M-H] <sup>-</sup> | 277.2168 | 277.2168 | 0.14 | 277.2169 259.2067<br>275.2018 233.2277 | ↓*   |    |
| 89 <sup>ab</sup> | 25.06 | C <sub>30</sub> H <sub>48</sub> O <sub>3</sub>  | ursolic acid                                                                                                                                                                                                              | [M-H] <sup>-</sup> | 455.3527 | 455.3525 | 0.40 | 455.3525 407.3335<br>409.3466          | ↓*** | 14 |

<sup>a</sup> Comparison with reference standards.

<sup>b</sup> “↑” indicates the increased levels of the compound contents after processing; “↓” indicates the decrease levels of the compound contents after processing; \*,  $P < 0.05$ ; \*\*,  $P < 0.01$ ; \*\*\*,  $P < 0.001$ .

## References

- 1 D. D. Wang, M. Qi, Q. M. Yang, R. C. Tong, R. Wang, S. W. A. Bligh, L. Yang, and Z. T. Wang, Comprehensive metabolite profiling of Plantaginis Semen using ultra high performance liquid chromatography with electrospray ionization quadrupole time-of-flight tandem mass spectrometry coupled with elevated energy technique, *Journal of Separation Science*, **2016**, *39* (10), 1842–1852, DOI: 10.1002/jssc.201501149.
- 2 R. Nina, G. Edith, F. Henrik, R. J. Søren, and E. O. Carl, Chemotaxonomy of Plantago. Iridoid glucosides and caffeoyl phenylethanoid glycosides, *Phytochemistry*, **2000**, *55* (4), 337-348, DOI: 10.1016/S0031-9422(00)00306-X.
- 3 P. F. Yan, G. Y. Liu, S. M. Zhao, L. L. Song, L. N. Tan, Y. R. Jin, and X. W. Li, Studies on Chemical Constituents of Plantago depressa Willd, *Chinese Pharmaceutical Journal*, **2009**, *44* (1), 19-21.
- 4 J. X. Zeng, Y. Bi, B. B. Xu, G. Ren, J. Wang, J. X. Zhu, and Y. Y. Zhu, Chemical Constituents from Seeds of Plantago asiatica, *Journal of Chinese Medicinal Materials*, **2015**, *38* (5), 985-987.
- 5 Y. L. Feng, Effective Constituents and Mechanism of Plantaginis Semen against Aryl Hydrocarbon Receptor-Mediated Renal Fibrosis, Northwest University, 2019.
- 6 B. B. Xu, L. Zhang, J. X. Zeng, Y. Bi, J. Wang, G. Ren, H. L. Wang, M. Li, and H. Zou, Phenols from Plantaginis Semen, *Chinese Traditional Patent Medicine*, **2017**, *39* (3), 544-547.
- 7 M. Toshio, I. Mie, A. Chiko, U. Akira, O. Yuki, and T. Hisayuki, Phenylethanoid glycosides from Plantago asiatica, *Phytochemistry*, **1991**, *30* (6), 2015-2018, DOI: 10.1016/0031-9422(91)85059-9.
- 8 M. Yoshinori, T. Seiko, T. Kosaku, K. Junichi, and I. Tsukasa, Altitudinal variation of UV-absorbing compounds in Plantago asiatica, *Biochemical Systematics & Ecology*, **2009**, *37* (4), 378-384, DOI: 10.1016/j.bse.2009.07.005.
- 9 Y. Wan, The Purification, Structure Elucidation and activities of polysaccharides, flavonoids and phenylethanoid glycosides in Semen Plantaginis, Nanchang University, 2007.
- 10 V. I. Lebedev-Kosov, Flavonoids of Plantago major, *Chemistry of Natural Compounds*, **1976**, *12* (6), 730-730, DOI: 10.1007/BF00564976.
- 11 M. Qi, A. Xiong, F. Geng, L. Yang, and Z. T. Wang, A novel strategy for target profiling analysis of bioactive phenylethanoid glycosides in Plantago medicinal plants using ultra-performance liquid chromatography coupled with tandem quadrupole mass spectrometry, *Journal of Separation Science*, **2012**, *35* (12), 1470-1478. DOI: 10.1002/jssc.201200010.
- 12 L. C. Chiang, W. Chiang, and M. Y. Chang, Ng, L. T.; Lin, C. C. Antiviral activity of Plantago major extracts and related compounds, *Antiviral Research*, **2002**, *55* (1), 53-62, DOI: 10.1016/S0166-3542(02)00007-4.
- 13 V. I. Lebedev-Kosov, Flavonoids and iridoids of Plantago major and Plantago asiatica, *Rastitel'nye resursy*, **1980**, 403-406.
- 14 P. F. Yan, Studies on Chemical Constituents of Plantago Depressa Willd, Jilin University, 2008.
